# Supplementary material for: The Metabolic Benefits of Menopausal Hormone Therapy Are Not Mediated by Improved Nutritional Habits. The OsteoLaus Cohort
Source: Nutrients. 2019 Aug 16;11(8):1930. doi: 10.3390/nu11081930 (PMC6722637; doi:10.3390/nu11081930)
Supplement: Supplementary file 1 [file nutrients-11-01930-s001.pdf]

**Table S1.** Characteristics of the participants included and excluded from the analysis, OsteoLaus study, Lausanne, Switzerland.

|                                      | Included   | Excluded   | <i>p</i> -Value |
|--------------------------------------|------------|------------|-----------------|
| Number                               | 839        | 214        |                 |
| Age (years)                          | 62.8 ± 7.5 | 64.2 ± 8.0 | 0.014           |
| Educational level (%)                |            |            | <0.001          |
| University                           | 141 (16.8) | 21 (9.8)   |                 |
| High school                          | 220 (26.2) | 50 (23.4)  |                 |
| Apprenticeship                       | 332 (39.6) | 73 (34.1)  |                 |
| Mandatory                            | 146 (17.4) | 70 (32.7)  |                 |
| Smoking categories (%)               |            |            | 0.434           |
| Never                                | 367 (43.7) | 91 (45.3)  |                 |
| Former                               | 321 (38.3) | 68 (33.8)  |                 |
| Current                              | 151 (18.0) | 42 (20.9)  |                 |
| Body mass index (kg/m <sup>2</sup> ) | 25.4 ± 4.1 | 26.3 ± 4.7 | 0.004           |
| BMI categories (%)                   |            |            | 0.038           |
| Normal                               | 414 (49.3) | 89 (41.6)  |                 |
| Overweight                           | 305 (36.4) | 81 (37.9)  |                 |
| Obese                                | 120 (14.3) | 44 (20.6)  |                 |
| Sedentary status (%)                 | 543 (64.7) | 44 (71.0)  | 0.319           |
| Diabetes (%)                         | 40 (4.8)   | 24 (11.3)  | <0.001          |

BMI, body mass index. Results are expressed as a number of participants (percentage) for categorical variables and as average ± standard deviation for continuous variables. Between-group comparisons performed using chi-square for categorical variables and student's t-test for continuous variables. Percentages in the excluded group might not correspond to the total sample size, due to missing values.
